# Supplementary material
Source: MDPI journal article supplement (https://www.mdpi.com/2035-8377/15/4/95)

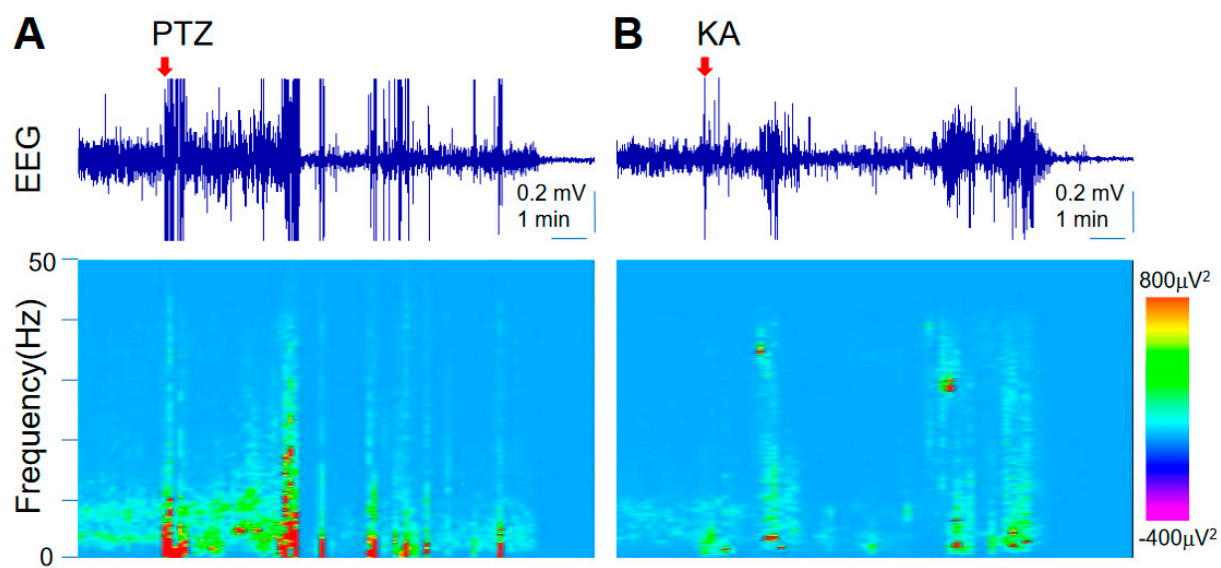

**Figure S1:** EEG and spectral heatmap of PTZ- and KA-induced seizures

Supplement: s1 [file s1]
